# Supplementary material
Source: PubMed Central journal article supplement (PMC3183309)
Supplement: NIHMS316092-supplement-Supp_Material_S1.pdf [file NIHMS316092-supplement-Supp_Material_S1.pdf]

Supplementary Information for “A Finite Field Method for Calculating Molecular Polarizability Tensors for Arbitrary Multipole Rank” by D.M. Elking et al.

## Inter-conversion Formulae Between $\hat{\zeta}_{l_x l_y l_z}^{(l)}(\mathbf{r})$ and $C_{lm}(\mathbf{r})$

Inter-conversion formulae (given in eqns. A.11- A.14 of the main text) between the traceless multipole operator  $\hat{\zeta}_{l_x l_y l_z}^{(l)}(\mathbf{r})$  (eqn. 24) and the solid harmonic function  $C_{lm}(\mathbf{r})$  (eqn. A.7) are derived in the following report. Eqns. A.11 – A.14 of the main text are summarized by

$$\hat{\zeta}_{l_x l_y l_z}^{(l)}(\mathbf{r}) = \sum_{n=0}^{l_x+l_y} b_n^{l_x l_y l} C_{l, 2n-l_x-l_y}(\mathbf{r}) \quad (\text{A.11})$$

$$C_{lm}(\mathbf{r}) = \sum_{k=0}^{|m|} c_k^{lm} \hat{\zeta}_{|m|-k, k, l-|m|}^{(l)}(\mathbf{r}) \quad (\text{A.12})$$

where  $b_n^{l_x l_y l}$  and  $c_k^{l, m}$  are constants given by

$$b_n^{l_x l_y l} \equiv \frac{i^{l_y} A_{l, 2n-l_x-l_y}}{2^{l_x+l_y} l!} \sum_{q=\max(0, n-l_x)}^{\min(l_y, n)} \binom{l_x}{n-q} \binom{l_y}{q} (-1)^{n+q} \quad (\text{A.13})$$

$$c_k^{lm} \equiv \begin{cases} \frac{l!(-1)^{m_+}}{A_{lm}} \binom{|m|}{k} i^k & m \geq 0 \\ \frac{l!(-1)^k}{A_{lm}} \binom{|m|}{k} i^k & m < 0 \end{cases} \quad (\text{A.14})$$

and  $A_{lm} \equiv \sqrt{(l+m)!(l-m)!}$  (eqn. A.5). Background information is summarized in the next section, which is followed by a proof of eqns. A.11 and A.12.

## I) Background

### 1) Traceless Cartesian Multipole Operator

Recall the definition for the traceless Cartesian multipole operator given in eqn. 24

$$\hat{\zeta}_{l_x l_y l_z}^{(l)}(\mathbf{r}) \equiv \frac{(-1)^l}{l!} r^{2l+1} \partial_x^{l_x} \partial_y^{l_y} \partial_z^{l_z} \frac{1}{r} \quad (\text{S1})$$

where  $l \equiv l_x + l_y + l_z$ .

### 2) Polynomial expression for $C_{lm}(\mathbf{r})$

Recall the polynomial expression for  $C_{lm}(x, y, z)$  for  $-l \leq m \leq l$  in eqn. A.7

$$C_{lm}(\mathbf{r}) = (-1)^{m_+} \frac{A_{lm}}{2^{|m|}} \sum_{k=0}^{\lfloor \frac{l-|m|}{2} \rfloor} \left(\frac{-1}{4}\right)^k \frac{z^{l-|m|-2k} (x+iy)^{m_++k} (x-iy)^{m_-+k}}{(l-|m|-2k)!(m_++k)!(m_-+k)!} \quad (\text{S2})$$

where  $m_{\pm} \equiv (|m| \pm m)/2$ .

### 3) Expansion of $1/|\mathbf{r} - \mathbf{r}'|$

For  $r < r'$ ,  $1/|\mathbf{r} - \mathbf{r}'|$  can be expanded by<sup>86</sup>

$$\begin{aligned} \frac{1}{|\mathbf{r} - \mathbf{r}'|} &= \sum_{l=0}^{\infty} \sum_{m=-l}^l \frac{4\pi}{2l+1} Y_{lm}(\theta, \phi) Y_{lm}^*(\theta', \phi') \frac{r^l}{r'^{l+1}} \\ &= \sum_{l=0}^{\infty} \sum_{m=-l}^l C_{lm}(\mathbf{r}) I_{lm}^*(\mathbf{r}') \end{aligned} \quad (\text{S3})$$

where  $Y_{lm}(\theta, \phi)$  is a spherical harmonic (eqn. A.1),  $C_{lm}(\mathbf{r}) \equiv r^l \sqrt{\frac{4\pi}{2l+1}} Y_{lm}(\theta, \phi)$  (eqn. A.3), and

$I_{lm}(\mathbf{r}') \equiv C_{lm}(\mathbf{r}')/r'^{2l+1}$  is an irregular solid harmonic function.

### 4) Derivative Transformations between $(x, y)$ and $(x_+, x_-)$

The complex variables  $x_+$  and  $x_-$  are defined in terms of  $x$  and  $y$  by

$$x_{\pm} \equiv x \pm iy \quad (\text{S4})$$

Similarly,  $x$  and  $y$  can be expressed in terms of  $x_+$  and  $x_-$  by

$$x = \frac{1}{2}(x_+ + x_-) \quad y = \frac{1}{2i}(x_+ - x_-) \quad (\text{S5})$$

Derivatives with respect to  $x$  and  $y$  can be transformed to derivatives with respect to  $x_+$  and  $x_-$  by

$$\partial_{\pm} \equiv \frac{\partial}{\partial x_{\pm}} = \frac{\partial x}{\partial x_{\pm}} \frac{\partial}{\partial x} + \frac{\partial y}{\partial x_{\pm}} \frac{\partial}{\partial y} = \frac{1}{2} \left( \frac{\partial}{\partial x} \mp i \frac{\partial}{\partial y} \right) = \frac{1}{2} (\partial_x \mp i \partial_y) \quad (\text{S6})$$

Similarly, derivatives with respect to  $x_+$  and  $x_-$  can be transformed to derivatives with respect to  $x$  and  $y$  by

$$\partial_x = \frac{\partial}{\partial x} = \frac{\partial x_+}{\partial x} \frac{\partial}{\partial x_+} + \frac{\partial x_-}{\partial x} \frac{\partial}{\partial x_-} = \frac{\partial}{\partial x_+} + \frac{\partial}{\partial x_-} = \partial_+ + \partial_- \quad (\text{S7})$$

$$\partial_y = \frac{\partial}{\partial y} = \frac{\partial x_+}{\partial y} \frac{\partial}{\partial x_+} + \frac{\partial x_-}{\partial y} \frac{\partial}{\partial x_-} = i \left( \frac{\partial}{\partial x_+} - \frac{\partial}{\partial x_-} \right) = i(\partial_+ - \partial_-) \quad (\text{S8})$$

#### 4) Binomial Theorem

For an integer  $m \geq 0$ , the binomial theorem is given by

$$(a + b)^m = \sum_{k=0}^m \binom{m}{k} a^{m-k} b^k \quad (\text{S9})$$

where  $\binom{m}{k} \equiv \frac{m!}{k!(m-k)!}$

## II) Proof of Eqns. A.11 and A.12

**Theorem 1:**  $\partial_z^{l-|m|-2k} \partial_+^{m_++k} \partial_-^{m_-+k} C_{lm'}(\mathbf{r}) = \begin{cases} \frac{(-1)^{m_++k}}{2^{|m|+2k}} A_{lm} & m = m' \\ 0 & m \neq m' \end{cases} \quad (\text{S10})$

where  $m_{\pm} \equiv (|m| \pm m)/2$ ,  $A_{lm} \equiv \sqrt{(l+m)!(l-m)!}$  (eqn. A.5), and  $k \leq (l-|m|)/2$ .

Proof: From eqn. S2,

$$\partial_z^{l-|m|-2k} \partial_+^{m_++k} \partial_-^{m_-+k} C_{lm'}(\mathbf{r}) = (-1)^{m_+} \frac{A_{lm'}}{2^{|m'|}} \sum_{k'=0}^{\lfloor \frac{l-|m'|}{2} \rfloor} \left( \frac{-1}{4} \right)^{k'} \frac{\partial_z^{l-|m|-2k} \partial_+^{m_++k} \partial_-^{m_-+k} \left( z^{l-|m'|-2k'} (x+iy)^{m_++k'} (x-iy)^{m_-'+k'} \right)}{(l-|m'|-2k')!(m_++k')!(m_-'+k')!} \quad (\text{S11})$$

The sum contains non-zero terms which satisfy

$$l-|m|-2k \leq l-|m'|-2k' \quad \text{or} \quad |m'|+2k' \leq |m|+2k \quad (\text{S12})$$

$$m_++k \leq m_++k' \quad (\text{S13})$$

$$m_-+k \leq m_-'+k' \quad (\text{S14})$$

Note  $|m| = m_+ + m_-$  and  $m = m_+ - m_-$  (with similar expressions for  $|m'|$  and  $m'$ ). Adding eqns. S13 and S14 and comparing this result to eqn. S12 gives

$$|m'|+2k' = |m|+2k \quad (\text{S15})$$

Substituting eqn. S15 into eqn. S13 gives

$$m_-+k \geq m_-'+k' \quad (\text{S16})$$

Comparing eqn. S16 with eqn. S14 shows that

$$m_-+k = m_-'+k' \quad (\text{S17})$$

Substituting eqn. S17 into eqn. S15 gives

$$m_++k = m_++k' \quad (\text{S18})$$

From explicit consideration of both cases  $m \geq 0$  and  $m < 0$ , it is clear from eqns. S17 and S18 that

$$m = m' \quad k = k' \quad (\text{S19})$$

Thus, the only non-zero terms in the sum of eqn. S11 are when  $m = m'$  and  $k = k'$  giving the desired result

$$\partial_z^{l-|m|-2k} \partial_+^{m_++k} \partial_-^{m_-+k} C_{lm'}(\mathbf{r}) = \begin{cases} \frac{(-1)^{k+m_+} A_{lm}}{2^{|m|+2k}} & m = m' \\ 0 & m \neq m' \end{cases} \quad (\text{S20})$$

**Theorem 2:**  $C_{lm}(\mathbf{r}) = r^{2l+1} \frac{2^{|m|+2k}}{A_{lm}} (-1)^{l+k+m_+} \partial_z^{l-|m|-2k} \partial_+^{m_++k} \partial_-^{m_++k} \frac{1}{r}$  (S21)

where  $k \leq (l - |m|)/2$ .

Proof: Recall eqn. S3, for  $r < r'$

$$\frac{1}{|\mathbf{r} - \mathbf{r}'|} = \sum_{l'=0}^{\infty} \sum_{m'=-l'}^{l'} C_{l'm'}(\mathbf{r}) I_{l'm'}^*(\mathbf{r}')$$

Now apply the derivative operator  $\partial_z^{l-|m|-2k} \partial_+^{m_++k} \partial_-^{m_++k}$  to both sides of eqn. S3

$$\partial_z^{l-|m|-2k} \partial_+^{m_++k} \partial_-^{m_++k} \frac{1}{|\mathbf{r} - \mathbf{r}'|} = \partial_z^{l-|m|-2k} \partial_+^{m_++k} \partial_-^{m_++k} \sum_{l'=l}^{\infty} \sum_{m'=-l'}^{l'} C_{l'm'}(\mathbf{r}) I_{l'm'}^*(\mathbf{r}')$$
 (S22)

since  $C_{l'm'}(\mathbf{r})$  is a homogenous polynomial of degree  $l$ ,  $\partial_z^{l-|m|-2k} \partial_+^{m_++k} \partial_-^{m_++k} C_{l'm'}(\mathbf{r}) = 0$  for  $l' < l$ .

Applying Theorem 1 to eqn. S22 gives

$$\partial_z^{l-|m|-2k} \partial_+^{m_++k} \partial_-^{m_++k} \frac{1}{|\mathbf{r} - \mathbf{r}'|} = \frac{(-1)^{k+m_+} A_{lm} I_{lm}^*(\mathbf{r}')}{2^{|m|+2k}} + \partial_z^{l-|m|-2k} \partial_+^{m_++k} \partial_-^{m_++k} \sum_{l'=l+1}^{\infty} \sum_{m'=-l'}^{l'} C_{l'm'}(\mathbf{r}) I_{l'm'}^*(\mathbf{r}')$$
 (S23)

Note that taking derivatives of  $1/|\mathbf{r} - \mathbf{r}'|$  with respect to  $\mathbf{r}'$  instead of  $\mathbf{r}$  results in a factor of  $(-1)^l$

$$\partial_z^{l-|m|-2k} \partial_+^{m_++k} \partial_-^{m_++k} \frac{1}{|\mathbf{r} - \mathbf{r}'|} = (-1)^l \partial_{z'}^{l-|m|-2k} \partial_{+'}^{m_++k} \partial_{-'}^{m_++k} \frac{1}{|\mathbf{r} - \mathbf{r}'|}$$
 (S24)

Substituting eqn. S24 into eqn. S23 gives

$$\begin{aligned} (-1)^l \partial_{z'}^{l-|m|-2k} \partial_{+'}^{m_++k} \partial_{-'}^{m_++k} \frac{1}{|\mathbf{r} - \mathbf{r}'|} &= \frac{(-1)^{k+m_+} A_{lm} I_{lm}^*(\mathbf{r}')}{2^{|m|+2k}} \\ &+ \partial_{z'}^{l-|m|-2k} \partial_{+'}^{m_++k} \partial_{-'}^{m_++k} \sum_{l'=l+1}^{\infty} \sum_{m'=-l'}^{l'} C_{l'm'}(\mathbf{r}) I_{l'm'}^*(\mathbf{r}') \end{aligned}$$
 (S25)

Now take the limit as  $\mathbf{r} \rightarrow 0$  in eqn. S25 and note  $I_{lm}(\mathbf{r}') \equiv C_{lm}(\mathbf{r}')/r'^{2l+1}$

$$(-1)^l \partial_{z'}^{l-|m|-2k} \partial_{+'}^{m_++k} \partial_{-'}^{m_++k} \frac{1}{|\mathbf{r}'|} = \frac{(-1)^{k+m_+} A_{lm} C_{lm}^*(\mathbf{r}')}{2^{|m|+2k} r'^{2l+1}}$$
 (S26)

since  $\partial_z^{l-|m|-2k} \partial_+^{m_++k} \partial_-^{m_-+k} C_{l'm'}(\mathbf{r})$  is a homogenous polynomial of degree  $l' - l$  for  $l' > l$  and vanishes as  $\mathbf{r} \rightarrow 0$ . Solving for  $C_{lm}(\mathbf{r})$  in eqn. S26 gives the desired result (after dropping the ' symbol)

$$C_{lm}(\mathbf{r}) = r^{2l+1} \frac{2^{|m|+2k}}{A_{lm}} (-1)^{l+k+m_+} \partial_z^{l-|m|-2k} \partial_-^{m_++k} \partial_+^{m_-+k} \frac{1}{r} \quad (\text{S27})$$

where  $\partial_{\pm}^* = \partial_{\mp}$ .

**Theorem 3:** Transformation from  $\hat{\zeta}_{l_x, l_y, l_z}^{(l)}(\mathbf{r})$  to  $C_{lm}(\mathbf{r})$ :

$$C_{lm}(\mathbf{r}) = \sum_{k=0}^{|m|} c_k^{lm} \hat{\zeta}_{|m|-k, k, l-|m|}^{(l)}(\mathbf{r}) \quad (\text{S28})$$

where  $c_k^{lm}$  are constants given by

$$c_k^{lm} \equiv \begin{cases} \frac{l!(-1)^{m_+}}{A_{lm}} \binom{|m|}{k} i^k & m \geq 0 \\ \frac{l!(-1)^k}{A_{lm}} \binom{|m|}{k} i^k & m < 0 \end{cases}$$

Proof: Consider Theorem 2 with  $k = 0$  and  $m \geq 0$  ( $m_+ = m$  and  $m_- = 0$ )

$$C_{lm}(\mathbf{r}) = \frac{(-1)^{l+m} 2^m}{A_{lm}} r^{2l+1} \partial_z^{l-m} \partial_-^m \frac{1}{r} \quad (\text{S29})$$

Insert the expression for  $\partial_-$  from eqn. S6 into eqn. S29

$$C_{lm}(\mathbf{r}) = \frac{(-1)^{l+m}}{A_{lm}} r^{2l+1} \partial_z^{l-m} \left( \frac{\partial}{\partial x} + i \frac{\partial}{\partial y} \right)^m \frac{1}{r} \quad (\text{S30})$$

The binomial theorem (eqn. S9) is applied to eqn. S30 to give the desired result.

$$\begin{aligned} C_{lm}(\mathbf{r}) &= \frac{(-1)^{l+m}}{A_{lm}} \sum_{k=0}^m \binom{m}{k} i^k r^{2l+1} \partial_x^{m-k} \partial_y^k \partial_z^{l-m} \frac{1}{r} \\ &= \frac{l!(-1)^m}{A_{lm}} \sum_{k=0}^m \binom{m}{k} i^k \hat{\zeta}_{m-k, k, l-m}^{(l)}(\mathbf{r}) \end{aligned} \quad (\text{S31})$$

where the definition for  $\hat{\zeta}_{l_x, l_y, l_z}^{(l)}(\mathbf{r})$  (eqn. S1) with  $l_x = m - k$ ,  $l_y = k$ ,  $l_z = l - m$  was used in the last step.

Thus, for  $m \geq 0$

$$c_k^{lm} \equiv \frac{l!(-1)^{m+}}{A_{lm}} \binom{|m|}{k} i^k \quad m \geq 0 \quad (\text{S32})$$

For  $m < 0$ ,  $c_k^{lm}$  can be found by considering  $C_{l-m}(\mathbf{r}) = (-1)^m C_{lm}^*(\mathbf{r})$  as

$$c_k^{lm} \equiv \frac{l!(-1)^k}{A_{lm}} \binom{|m|}{k} i^k \quad m < 0 \quad (\text{S33})$$

**Theorem 4:** Transformation from  $C_{lm}(\mathbf{r})$  to  $\hat{\zeta}_{l_x, l_y, l_z}^{(l)}(\mathbf{r})$ :

$$\hat{\zeta}_{l_x, l_y, l_z}^{(l)}(\mathbf{r}) = \sum_{n=0}^{l_x + l_y} b_n^{l_x, l_y, l} C_{l, 2n - l_x - l_y}(\mathbf{r}) \quad (\text{S34})$$

where

$$b_n^{l_x, l_y, l} \equiv \frac{i^{l_y} A_{l, 2n - l_x - l_y}}{2^{l_x + l_y} l!} \sum_{q=\max(0, n - l_x)}^{\min(l_y, n)} \binom{l_x}{n - q} \binom{l_y}{q} (-1)^{n+q} \quad (\text{S35})$$

**Proof:** Recall the definition for  $\hat{\zeta}_{l_x, l_y, l_z}^{(l)}(\mathbf{r})$  in eqn. S1

$$\hat{\zeta}_{l_x, l_y, l_z}^{(l)}(\mathbf{r}) \equiv \frac{(-1)^l}{l!} r^{2l+1} \partial_x^{l_x} \partial_y^{l_y} \partial_z^{l_z} \frac{1}{r} \quad (\text{S1})$$

and eqns. S7 and S8

$$\partial_x = \partial_+ + \partial_- \quad (\text{S7})$$

$$\partial_y = i(\partial_+ - \partial_-) \quad (\text{S8})$$

Inserting eqns. S7 and S8 into eqn. S1 and applying the binomial theorem (eqn. S9) gives

$$\begin{aligned}
\hat{\zeta}_{l_x, l_y, l_z}^{(l)}(\mathbf{r}) &= \frac{(-1)^l}{l!} i^{l_y} r^{2l+1} (\partial_+ + \partial_-)^x (\partial_+ - \partial_-)^y \partial_z^{l_z} \frac{1}{r} \\
\hat{\zeta}_{l_x, l_y, l_z}^{(l)}(\mathbf{r}) &= \frac{(-1)^l}{l!} i^{l_y} r^{2l+1} \sum_{p=0}^{l_x} \sum_{q=0}^{l_y} \binom{l_x}{p} \binom{l_y}{q} (-1)^q \partial_+^{l_x+l_y-p-q} \partial_-^{p+q} \partial_z^{l_z} \frac{1}{r} \\
&= \frac{(-1)^l}{l!} i^{l_y} r^{2l+1} \sum_{n=0}^{l_x+l_y} (-1)^n I_n^{l_x, l_y} \partial_+^{l_x+l_y-n} \partial_-^n \partial_z^{l_z} \frac{1}{r}
\end{aligned} \tag{S36}$$

where

$$I_n^{l_x, l_y} \equiv \sum_{q=\max(0, n-l_x)}^{\min(l_y, n)} \binom{l_x}{n-q} \binom{l_y}{q} (-1)^{n+q} \tag{S37}$$

Recall Theorem 2,

$$r^{2l+1} \partial_+^{m_-+k} \partial_-^{m_++k} \partial_z^{l-|m|-2k} \frac{1}{r} = \frac{A_{lm}}{2^{|m|+2k}} (-1)^{l+k+m_+} C_{lm}(\mathbf{r}) \tag{S38}$$

Now let  $l_z \equiv l - |m| - 2k$  and  $n \equiv m_+ + k$ , then  $m_- + k = m_- + n - m_+ = n - m$ . And

$|m| + 2k = m_- + m_+ + 2k = l - l_z = l_x + l_y = n + n - m$ . So,  $m = 2n - l_x - l_y$  and

$m_- + k = n - m = l_x + l_y - n$ . Eqn. S38 becomes

$$r^{2l+1} \partial_+^{l_x+l_y-n} \partial_-^n \partial_z^{l_z} \frac{1}{r} = \frac{(-1)^{l+n} A_{l, 2n-l_x-l_y}}{2^{l_x+l_y}} C_{l, 2n-l_x-l_y}(\mathbf{r}) \tag{S39}$$

Inserting eqn. S39 into eqn. S36 gives the desired result

$$\begin{aligned}
\hat{\zeta}_{l_x, l_y, l_z}^{(l)}(\mathbf{r}) &= \sum_{n=0}^{l_x+l_y} \frac{i^{l_y}}{l!} I_n^{l_x, l_y} \frac{A_{l, 2n-l_x-l_y}}{2^{l_x+l_y}} C_{l, 2n-l_x-l_y}(\mathbf{r}) \\
&= \sum_{n=0}^{l_x+l_y} b_n^{l_x, l_y, l} C_{l, 2n-l_x-l_y}(\mathbf{r})
\end{aligned} \tag{S40}$$

where

$$\begin{aligned}
b_n^{l_x, l_y, l} &\equiv \frac{i^{l_y}}{l!} \frac{A_{l, 2n-l_x-l_y}}{2^{l_x+l_y}} I_n^{l_x, l_y} \\
&= \frac{i^{l_y} A_{l, 2n-l_x-l_y}}{2^{l_x+l_y} l!} \sum_{q=\max(0, n-l_x)}^{\min(l_y, n)} \binom{l_x}{n-q} \binom{l_y}{q} (-1)^{n+q}
\end{aligned} \tag{S41}$$
